# Supplementary material
Source: PubMed Central journal article supplement (PMC2194289)
Supplement: NIHMS36728-supplement-01.pdf [file NIHMS36728-supplement-01.pdf]

Figure S1

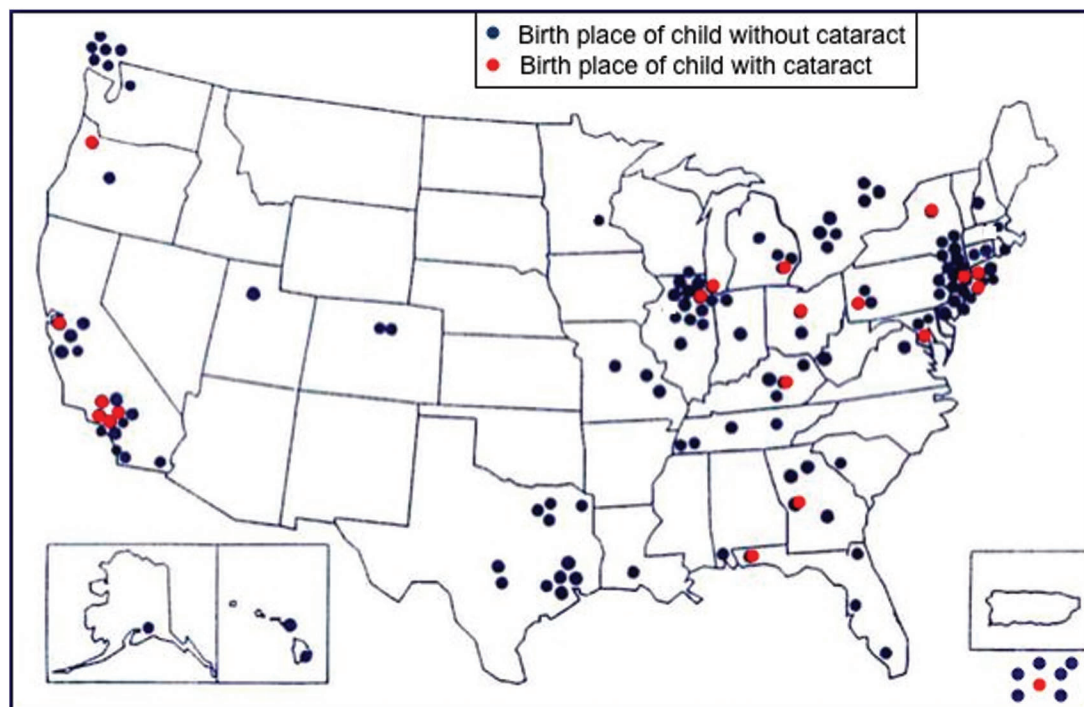

Figure S2

**Cortex**

*Anterior  
subcapsular  
cataract (6)*

*Cortical  
Cataract (0)*

*Anterior polar  
cataract (3)*

*Lamellar  
cataract (0)*

**Nucleus**

*Posterior  
subcapsular  
cataract (7)*

**Capsule**

*Nuclear  
cataract (5)*

**ANTERIOR**

**POSTERIOR**

6 unknown

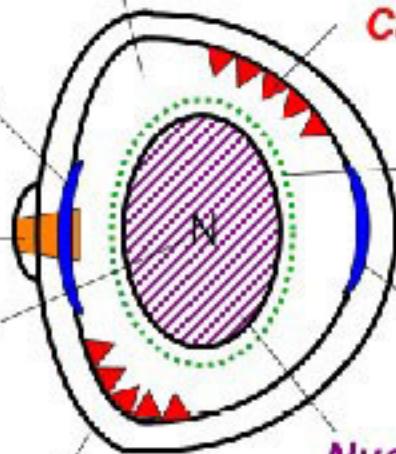

Figure S3

### Complexity of cataracts (n=27)

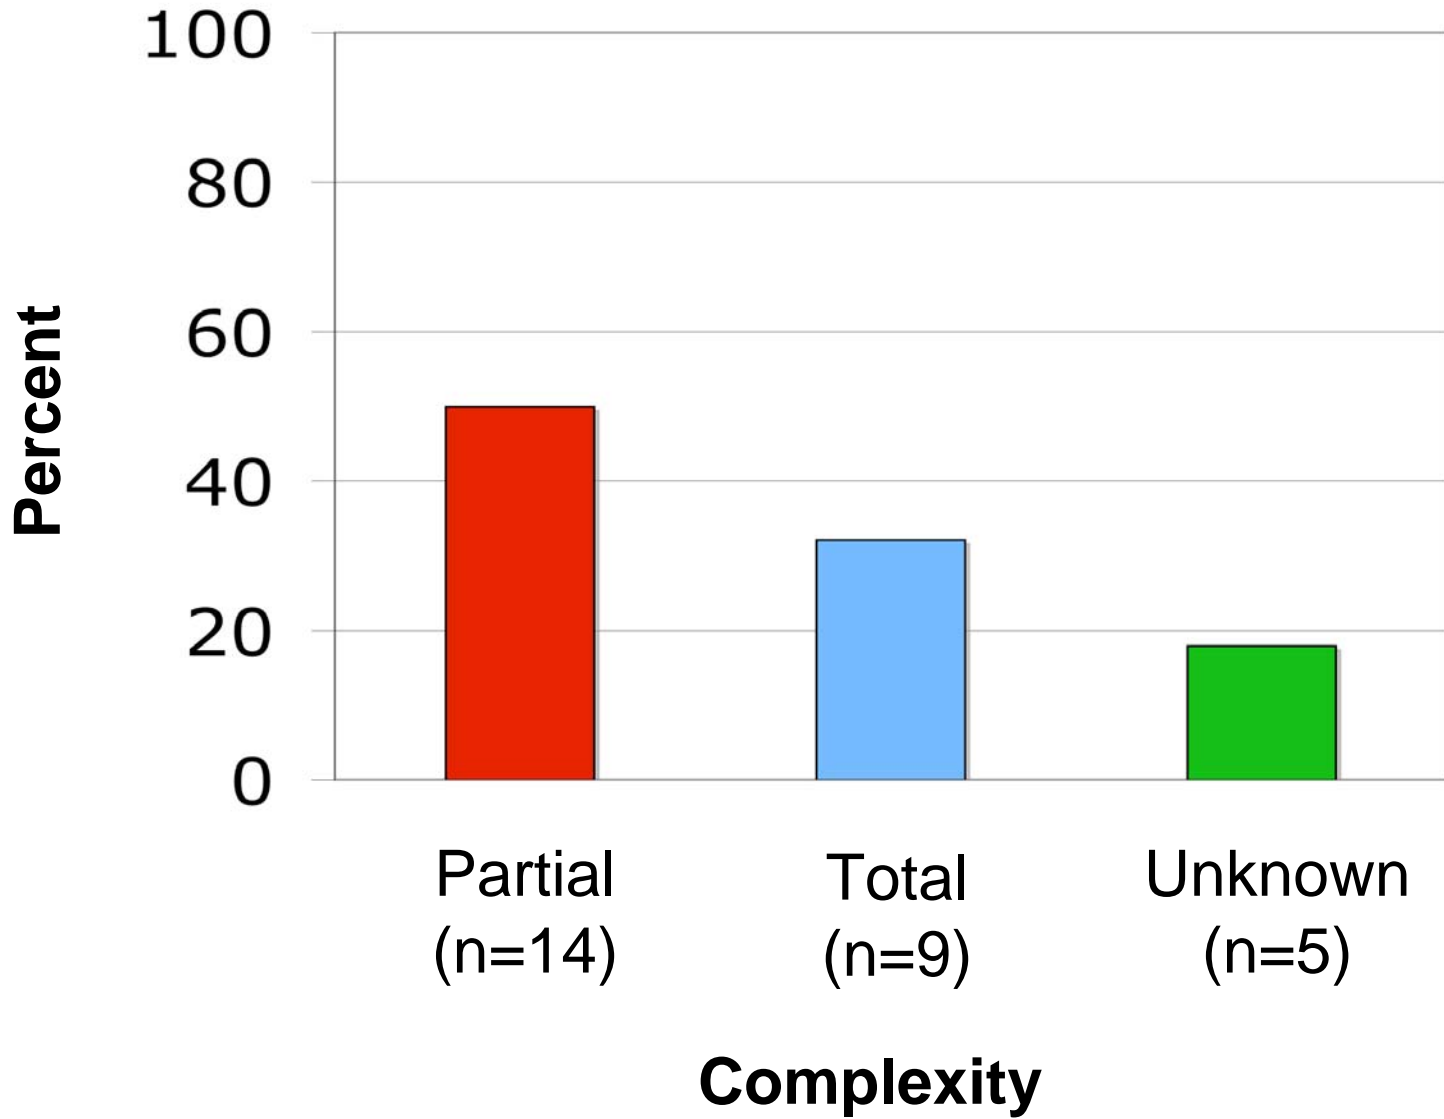

Figure S4

**A.**

Time of cataract acquisition  
relative to birth (n=27)

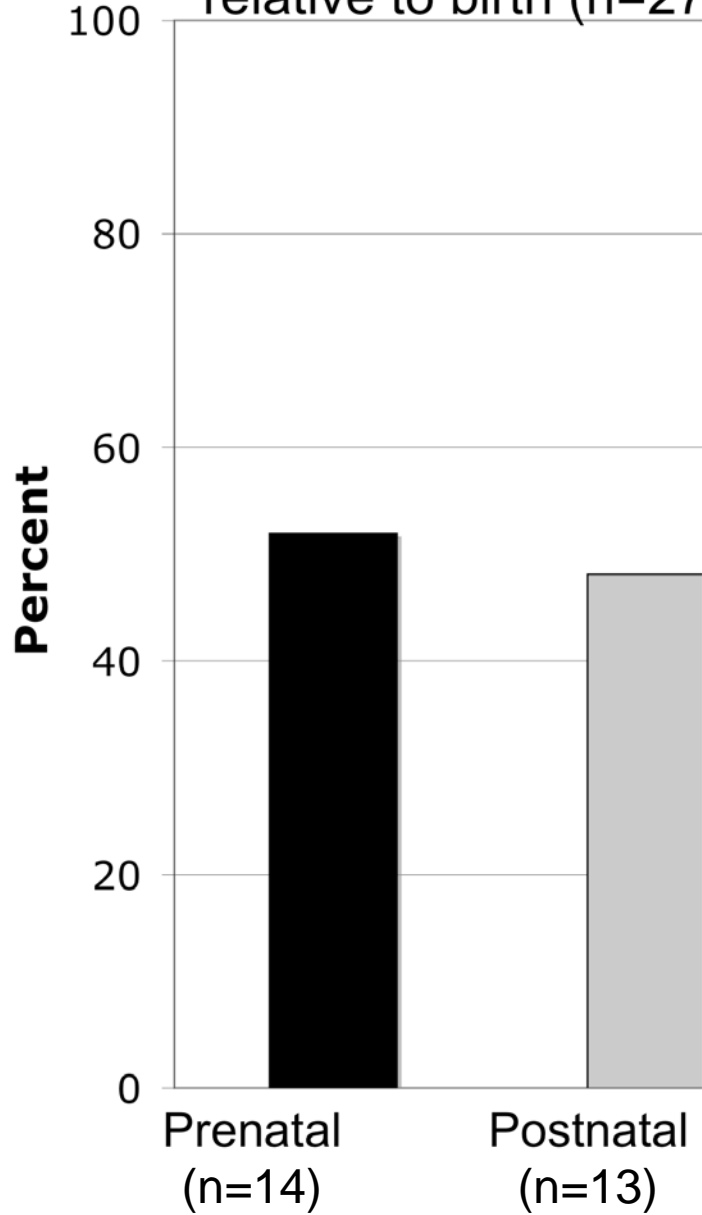

**B.**

Natural history of  
cataracts (n=27)

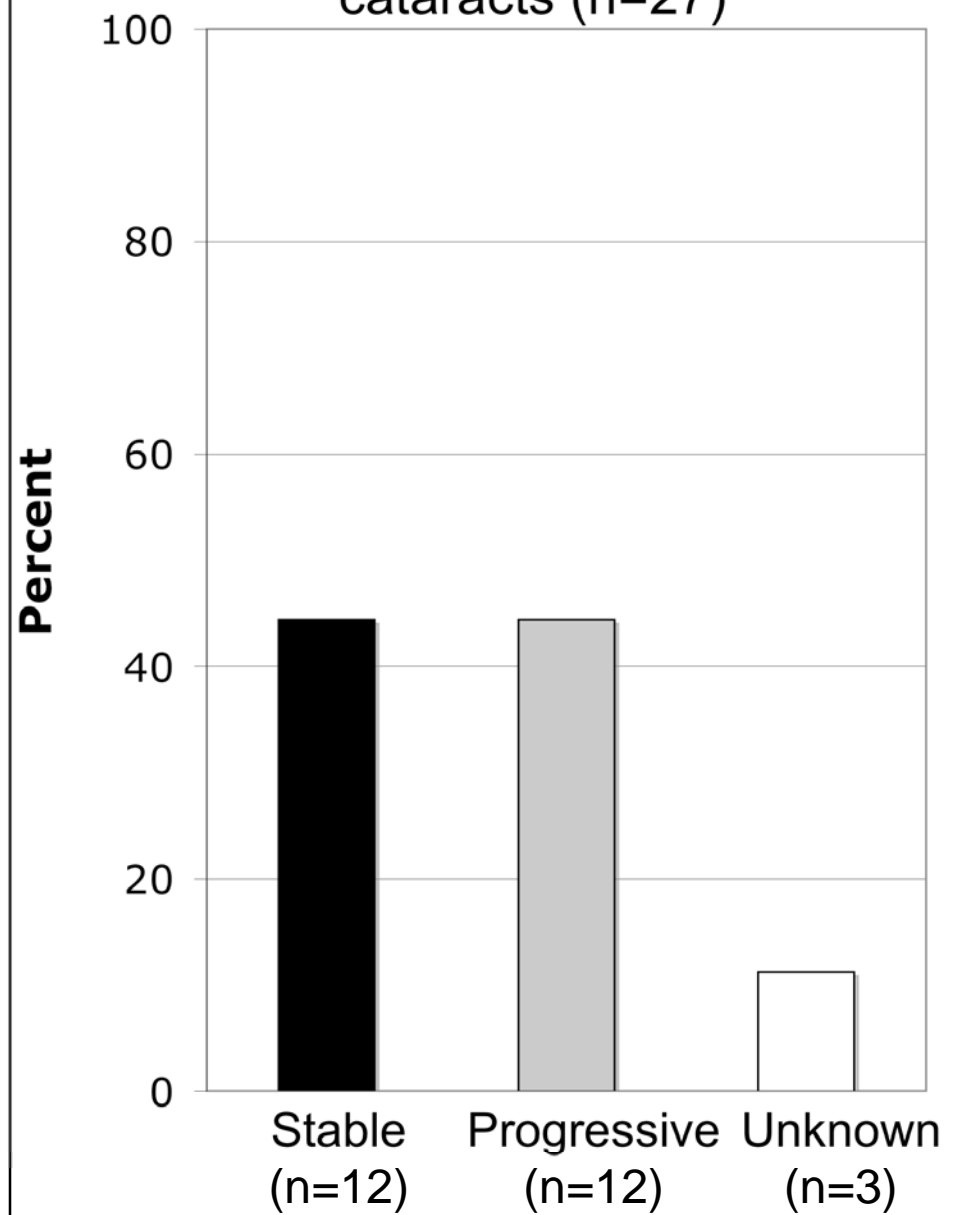

Figure S5

## Right Eye

## Left Eye

|        |                                                                                                                                                                                                                                                                                                                                                                                                                                       |                                                                                                                                                                                                                                                                                                                                                                                               |
|--------|---------------------------------------------------------------------------------------------------------------------------------------------------------------------------------------------------------------------------------------------------------------------------------------------------------------------------------------------------------------------------------------------------------------------------------------|-----------------------------------------------------------------------------------------------------------------------------------------------------------------------------------------------------------------------------------------------------------------------------------------------------------------------------------------------------------------------------------------------|
| Birth  | <ul style="list-style-type: none"> <li>• Fixes and follows</li> <li>• Microphthalmia, Microcornea</li> <li>• Posterior synechiae with bubbly lens opacities</li> <li>• Large macular chorioretinal scar</li> <li>• Three large peripheral chorioretinal scars</li> </ul>                                                                                                                                                              | <ul style="list-style-type: none"> <li>• Fixes and follows</li> <li>• Posterior synechiae</li> <li>• Dragging of the macula with large chorioretinal scar</li> </ul>                                                                                                                                                                                                                          |
| 2 mo   | <ul style="list-style-type: none"> <li>• No fixing or following</li> <li>• Total cataract</li> <li>• Poor view of the optic nerve and retina due to vitritis and total cataract</li> <li>• No RD or PHPV</li> <li>• Cataract extraction recommended</li> </ul>                                                                                                                                                                        | <ul style="list-style-type: none"> <li>• Fixes and follows</li> </ul>                                                                                                                                                                                                                                                                                                                         |
| 2.5 mo | <ul style="list-style-type: none"> <li>• Extracapsular cataract extraction with anterior capsulotomy followed by a posterior capsulotomy and anterior vitrectomy</li> </ul>                                                                                                                                                                                                                                                           | <ul style="list-style-type: none"> <li>• Fixes and follows</li> </ul>                                                                                                                                                                                                                                                                                                                         |
| 1 yr   | <ul style="list-style-type: none"> <li>• No fixing or following without contact lens.</li> <li>• Aphakic</li> <li>• <b>Esotropia of 50 prism diopters</b></li> <li>• Peripheral iridectomy, second surgery.</li> <li>• Large chorioretinal macular and peripheral scars.</li> </ul>                                                                                                                                                   | <ul style="list-style-type: none"> <li>• Fixes and follows</li> <li>• Reaches for objects.</li> <li>• Pendular nystagmus</li> <li>• Dragged macula and vessels with macular chorioretinal scar</li> </ul>                                                                                                                                                                                     |
| 3.5 yr | <ul style="list-style-type: none"> <li>• Microphthalmia, Microcornea</li> <li>• Pendular nystagmus</li> <li>• <b>Esotropia of 25 prism diopters</b></li> </ul>                                                                                                                                                                                                                                                                        | <ul style="list-style-type: none"> <li>• Extensive chorioretinal scar in macula, dragged macula and vessels.</li> </ul>                                                                                                                                                                                                                                                                       |
| 5 yr   | <ul style="list-style-type: none"> <li>• Fixes and follows</li> <li>• <b>Esotropia of 20 prism diopters</b></li> <li>• Corneal diameter 9mm x 9mm</li> <li>• Cycloplegic refraction +17.50 sphere</li> <li>• Persistent pendular nystagmus</li> <li>• Optic nerve normal</li> <li>• Large chorioretinal scar in the macula and 3 scars in the peripheral retina</li> </ul>                                                            | <ul style="list-style-type: none"> <li>• Fixes and follows</li> <li>• Corneal diameter 11mm x 10.5mm</li> <li>• -4.00 + 2.00 x 90 degrees</li> <li>• Optic nerve normal</li> <li>• Extensive chorioretinal scar extending from the optic nerve through the macula.</li> </ul>                                                                                                                 |
| 11 yr  | <ul style="list-style-type: none"> <li>• Corrected visual acuity at distance is 20/300</li> <li>• Corrected visual acuity at near is 20/400</li> <li>• <b>Esotropia of 18 prism diopters</b></li> <li>• Intraocular pressure of 20 mm Hg on 3 topical medications</li> <li>• Microcornea and microphthalmia</li> <li>• Band keratopath, aphakia, large chorioretinal scars in the macula and 3 scars in peripheral retina.</li> </ul> | <ul style="list-style-type: none"> <li>• Corrected visual acuity at distance is 20/400</li> <li>• Corrected visual acuity at near is 20/250</li> <li>• Slight decrease in abduction</li> <li>• Intraocular pressure of 18 mm Hg</li> <li>• Cornea is clear,</li> <li>• Extensive chorioretinal scar extending from the optic nerve through the macula, dragged macula and vessels.</li> </ul> |

Figure S6

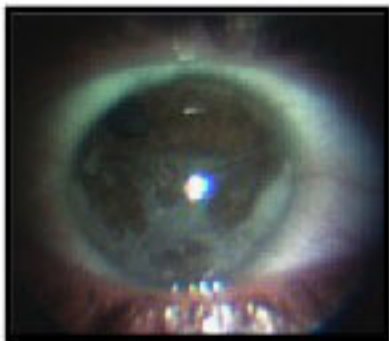

Right Eye

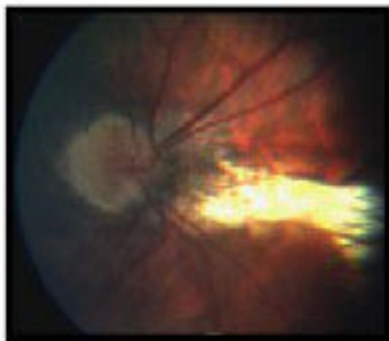

Left Eye

Figure S7

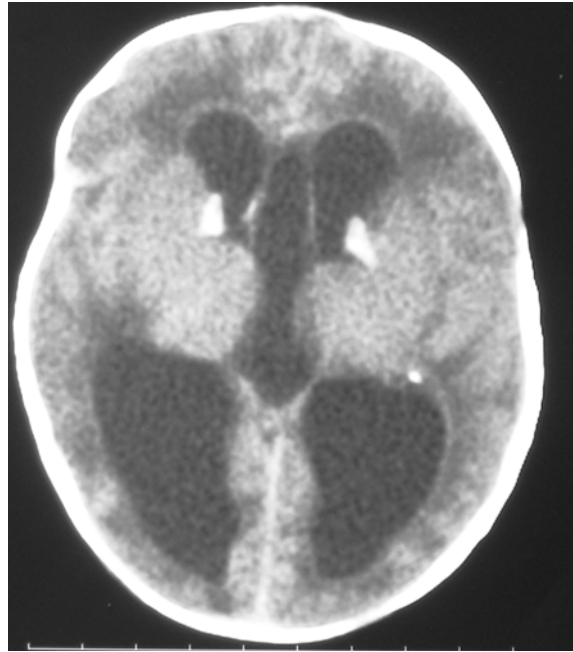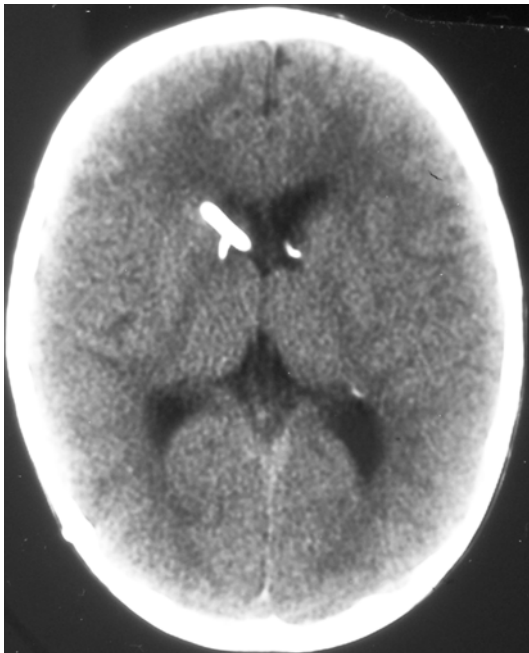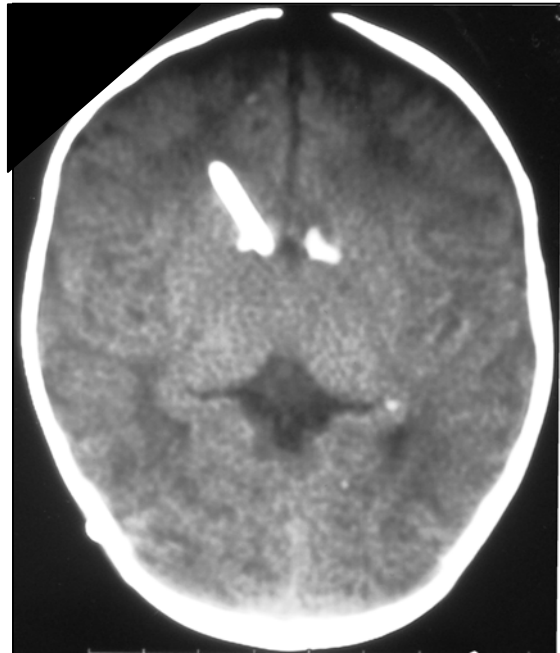

### Table S1. Characterization of cataracts

| Patient #     |    | Pre-natal | Post-natal | Morphology |                  |         |                   |   | Progression |             |   | Complexity |       |   | Cataract Surgery | Glaucoma | Retinal Detachment |
|---------------|----|-----------|------------|------------|------------------|---------|-------------------|---|-------------|-------------|---|------------|-------|---|------------------|----------|--------------------|
|               |    |           |            | Ant. Polar | Ant. Subcapsular | Nuclear | Post. Subcapsular | ? | Stable      | Progressive | ? | Partial    | Total | ? |                  |          |                    |
| 8 (F/A)       | OD |           |            |            |                  |         |                   |   |             |             |   |            |       |   |                  |          | X                  |
|               | OS |           |            |            |                  |         |                   |   |             |             |   |            |       |   |                  |          |                    |
| 10 (F/A)      | OD |           |            |            |                  |         |                   |   |             |             |   |            |       |   |                  |          |                    |
|               | OS |           |            |            |                  |         |                   |   |             |             |   |            |       |   |                  |          |                    |
| 14 (F/O)      | OD |           |            |            |                  |         |                   |   |             |             |   |            |       |   |                  |          |                    |
|               | OS |           |            |            |                  |         |                   |   |             |             |   |            |       |   |                  |          |                    |
| 15 (F/A)      | OD |           |            |            |                  |         |                   |   |             |             |   |            |       |   |                  |          |                    |
|               | OS |           |            |            |                  |         |                   |   |             |             |   |            |       |   |                  |          |                    |
| 27 (H/C)      | OD |           |            |            |                  |         |                   |   |             |             |   |            |       |   |                  |          |                    |
|               | OS |           |            |            |                  |         |                   |   |             |             |   |            |       |   |                  |          |                    |
| 32 (H/C)      | OD |           |            |            |                  |         |                   |   |             |             |   |            |       |   | a                |          |                    |
|               | OS |           |            |            |                  |         |                   |   |             |             |   |            |       |   | a                |          |                    |
| 34 (R/A)      | OD |           |            |            |                  |         |                   |   |             |             |   |            |       |   |                  |          |                    |
|               | OS |           |            |            |                  |         |                   |   |             |             |   |            |       |   |                  |          |                    |
| 40 (R/C)      | OD |           |            |            |                  |         |                   |   |             |             |   |            |       |   |                  |          |                    |
|               | OS |           |            |            |                  |         |                   |   |             |             |   |            |       |   |                  |          |                    |
| 47 (H/C)      | OD |           |            |            |                  |         |                   |   |             |             |   |            |       |   |                  |          |                    |
|               | OS |           |            |            |                  |         |                   |   |             |             |   |            |       |   | b                |          |                    |
| 55 (H/C)      | OD |           |            |            |                  |         |                   |   |             |             |   |            |       |   |                  |          |                    |
|               | OS |           |            |            |                  |         |                   |   |             |             |   |            |       |   |                  |          |                    |
| 60 (R/C)      | OD |           |            |            |                  |         |                   |   |             |             |   |            |       |   | a                |          |                    |
|               | OS |           |            |            |                  |         |                   |   |             |             |   |            |       |   |                  |          |                    |
| 66 (R/C)      | OD |           |            |            |                  |         |                   |   |             |             |   |            |       |   | c                |          |                    |
|               | OS |           |            |            |                  |         |                   |   |             |             |   |            |       |   |                  |          | X                  |
| 78 (R/A)      | OD |           |            |            |                  |         |                   |   |             |             |   |            |       |   |                  |          |                    |
|               | OS |           |            |            |                  |         |                   |   |             |             |   |            |       |   |                  |          |                    |
| 90 (R/C)      | OD |           |            |            |                  |         |                   |   |             |             |   |            |       |   |                  |          |                    |
|               | OS |           |            |            |                  |         |                   |   |             |             |   |            |       |   |                  |          |                    |
| 92 (R/A)      | OD |           |            |            |                  |         |                   |   |             |             |   |            |       |   |                  |          |                    |
|               | OS |           |            |            |                  |         |                   |   |             |             |   |            |       |   |                  |          |                    |
| 97 (R/A)      | OD |           |            |            |                  |         |                   |   |             |             |   |            |       |   |                  |          |                    |
|               | OS |           |            |            |                  |         |                   |   |             |             |   |            |       |   |                  |          |                    |
| 125 (F/C)     | OD |           |            |            |                  |         |                   |   |             |             |   |            |       |   |                  |          |                    |
|               | OS |           |            |            |                  |         |                   |   |             |             |   |            |       |   |                  |          |                    |
| 137 (F/C)     | OD |           |            |            |                  |         |                   |   |             |             |   |            |       |   |                  |          |                    |
|               | OS |           |            |            |                  |         |                   |   |             |             |   |            |       |   |                  |          |                    |
| 139 (F/C)     | OD |           |            |            |                  |         |                   |   |             |             |   |            |       |   |                  |          |                    |
|               | OS |           |            |            |                  |         |                   |   |             |             |   |            |       |   |                  |          |                    |
| 152 (R/A)     | OD |           |            |            |                  |         |                   |   |             |             |   |            |       |   |                  |          |                    |
|               | OS |           |            |            |                  |         |                   |   |             |             |   |            |       |   |                  |          | X                  |
| <b>TOTALS</b> |    | 14        | 13         | 3          | 6                | 5       | 7                 | 6 | 12          | 12          | 3 | 13         | 9     | 5 | 5                | 2        | 16                 |

KEY: **a** = extracapsular cataract extraction, **b** = enucleation at 14 years, **c** = pars plana lensectomy with silicone oil, **X** = eye with retinal detachment but no cataract

|  |                                                             |
|--|-------------------------------------------------------------|
|  | N/A = Not available, child diagnosed after 1st year of life |
|  | Severe findings at birth                                    |
